# Supplementary material for: Selective blockade of microRNA-31-5p/calcitonin receptor interaction reverses established atrial fibrosis and atrial arrhythmia substrate
Source: Research Square preprint supplement (doi:10.21203/rs.3.rs-8484728/v1), 2026-01-07
Supplement: Supplementary file 2 [file 84fcbcfcd7b918f5b52938d8.xlsx]

## Sheet: 1J
CTR protein
NC-mimic	miR31 mimic		Wilcoxon matched-pairs signed rank test
0.944879	0.509843		P value	0.0312
1.05143	0.531228		Exact or approximate P value?	Exact
1.28471	0.820265		P value summary	*
0.487449	0.408821		Significantly different (P < 0.05)?	Yes
0.992135	0.462039		One- or two-tailed P value?	Two-tailed
1.2394	0.485927		Sum of positive, negative ranks	0.000 , -21.00
			Sum of signed ranks (W)	-21
			Number of pairs	6
			Number of ties (ignored)	0

## Sheet: 1M
CTR protein
NC-inh	miR31 inh		Paired t test
1.46771	2.01421		P value	0.0112
0.991265	2.82392		P value summary	*
1.20437	2.33728		Significantly different (P < 0.05)?	Yes
0.704718	3.21013		One- or two-tailed P value?	Two-tailed
1.55745	1.84589		t, df	t=3.613, df=6
0.983031	1.31365		Number of pairs	7
0.091455	1.34558

## Sheet: 3E-F
CTR protein					for miR31 mimic
NC-mimic	miR31 mimic	NC-inh	miR31inh		Paired t test
0.972028	1.22094	1.08069	0.685618		P value	0.0339
0.310625	2.0242	1.21414	0.503447		P value summary	*
0.922444	4.16955	0.898724	0.899331		Significantly different (P < 0.05)?	Yes
1.34698	3.22959	0.799551	0.50648		One- or two-tailed P value?	Two-tailed
1.44793	2.35897	1.0069	0.31238		t, df	t=3.168, df=4
					Number of pairs	5
					for miR31 inhibitor
					Paired t test
					P value	0.0346
					P value summary	*
					Significantly different (P < 0.05)?	Yes
					One- or two-tailed P value?	Two-tailed
					t, df	t=3.148, df=4
					Number of pairs	5

## Sheet: 4M
CTR protein			Mann Whitney test
NC-TSB	miR31/CTR_TSB		P value	0.0022
1.09057	4.46699		Exact or approximate P value?	Exact
1.53421	2.06069		P value summary	**
0.278197	2.6386		Significantly different (P < 0.05)?	Yes
0.925507	1.59409		One- or two-tailed P value?	Two-tailed
0.819541	2.20617		Sum of ranks in column A,B	21 , 57
1.35197	2.0604		Mann-Whitney U	0

## Sheet: 5H
CTR protein			Paired t test
NC-TSB	miR31/CTR_TSB		P value	0.0019
0.639347	1.64964		P value summary	**
1.03928	2.05671		Significantly different (P < 0.05)?	Yes
2.06953	2.95131		One- or two-tailed P value?	Two-tailed
0.398529	1.03242		t, df	t=7.231, df=4
0.900261	1.35554		Number of pairs	5

## Sheet: 5I
Col1 protein				Col3 protein				aSMA protein
NC-TSB	TSB			NC-TSB	TSB			NC-TSB	TSB
NC-TSB	TSB			NC-TSB	TSB			NC-TSB	TSB
0.420682	0.203363			0.961049	0.948982			1.28833	0.906343
0.679528	0.17815			1.40773	0.270991			1.68674	1.31395
0.775004	0.275883			1.17511	0.190295			0.733391	0.904228
0.714522	0.209943			0.740903	0.379876			1.50284	1.81235
Unpaired t test				Unpaired t test				Unpaired t test
P value	0.0018			P value	0.0315			P value	0.8258
P value summary	**			P value summary	*			P value summary	ns
Significantly different (P < 0.05)?	Yes			Significantly different (P < 0.05)?	Yes			Significantly different (P < 0.05)?	No
One- or two-tailed P value?	Two-tailed			One- or two-tailed P value?	Two-tailed			One- or two-tailed P value?	Two-tailed
t, df	t=5.326, df=6			t, df	t=2.792, df=6			t, df	t=0.2299, df=6

## Sheet: S5A
CTR protein			Fibronectin protein			FGF1 protein			BAP1 protein			TNS1			COL3 protein
WT/Cre	miR31/Cre		WT / Cre	miR31 / Cre		WT / Cre	miR31 / Cre		WT / Cre	miR31 / Cre		WT / Cre	miR31 / Cre		WT / Cre	miR31 / Cre
0.734477	0.313763		1.17167	0.853229		1.84382	1.26476		0.430382	0.532217		0.376791	0.536018		1.23914	1.77013
0.200952	0.338572		0.473875	1.54432		1.08033	1.34587		0.584513	1.26737		0.285937	0.506964		1.33202	1.94119
0.227728	0.088275		0.81578	1.58446		1.62941	1.23491		0.91954	0.577549		0.401463	0.360271		1.44778	1.51882
0.573327	0.077622		1.27191	1.1615		1.6033	1.33295		1.19738	0.515529		0.289655	0.650853		0.832961	1.90565
	0.125439			0.978267			1.27566			0.702694			0.458873			1.47131
	0.021405			1.45398			0.854715			0.905895			0.575443			1.75874
	0.108609			1.18169			0.963533			1.1601			0.446082			1.42828
	0.026254			1.22442			0.705708			1.16487			0.446863			1.45199
Mann Whitney test			Unpaired t test			Unpaired t test			Unpaired t test			Unpaired t test			Mann Whitney test
P value	0.0485		P value	0.1143		P value	0.031		P value	0.7286		P value	0.01		P value	0.0081
Exact or approximate P value?	Exact		P value summary	ns		P value summary	*		P value summary	ns		P value summary	**		Exact or approximate P value?	Exact
P value summary	*		Significantly different (P < 0.05)?	No		Significantly different (P < 0.05)?	Yes		Significantly different (P < 0.05)?	No		Significantly different (P < 0.05)?	Yes		P value summary	**
Significantly different (P < 0.05)?	Yes		One- or two-tailed P value?	Two-tailed		One- or two-tailed P value?	Two-tailed		One- or two-tailed P value?	Two-tailed		One- or two-tailed P value?	Two-tailed		Significantly different (P < 0.05)?	Yes
One- or two-tailed P value?	Two-tailed		t, df	t=1.730, df=10		t, df	t=2.508, df=10		t, df	t=0.3569, df=10		t, df	t=3.170, df=10		One- or two-tailed P value?	Two-tailed
Sum of ranks in column A,B	38 , 40														Sum of ranks in column A,B	11 , 67
Mann-Whitney U	4														Mann-Whitney U	1

## Sheet: S5B
CTR protein			STK40 protein
WT / Cre	miR31 / Cre		WT / Cre	miR31 / Cre
0.081326	1.44888		1.5506	0.491967
1.01945	2.18614		0.942179	0.77385
1.13008	1.21181		1.37204	0.719318
0.868239	0.92266		0.96295	0.940004
	1.38692			1.25954
	3.06322			0.451219
	2.39182			0.693907
	1.5052			0.548109
Mann Whitney test			Unpaired t test
P value	0.0162		P value	0.0195
Exact or approximate P value?	Exact		P value summary	*
P value summary	*		Significantly different (P < 0.05)?	Yes
Significantly different (P < 0.05)?	Yes		One- or two-tailed P value?	Two-tailed
One- or two-tailed P value?	Two-tailed		t, df	t=2.779, df=10
Sum of ranks in column A,B	12 , 66
Mann-Whitney U	2

## Sheet: S5H
Fibronectin protein			aSMA			COL3 protein
WT / Cre	miR31 / Cre		WT / Cre	miR31 / Cre		WT / Cre	miR31 / Cre
0.195076	0.288198		0.024985	0.381114		4.34597	2.95166
0.187606	0.34704		0.022959	0.056079		4.1013	2.89228
0.213092	0.574077		0.041167	1.31688		0.342139	2.98542
0.755209	0.431175		0.03847	0.375809		2.13838	4.50787
0.736677	1.29303		0.047379	0.142795		2.57211	4.01911
Mann Whitney test			Mann Whitney test			Mann Whitney test
P value	0.4206		P value	0.0079		P value	0.4206
Exact or approximate P value?	Exact		Exact or approximate P value?	Exact		Exact or approximate P value?	Exact
P value summary	ns		P value summary	**		P value summary	ns
Significantly different (P < 0.05)?	No		Significantly different (P < 0.05)?	Yes		Significantly different (P < 0.05)?	No
One- or two-tailed P value?	Two-tailed		One- or two-tailed P value?	Two-tailed		One- or two-tailed P value?	Two-tailed
Sum of ranks in column A,B	23 , 32		Sum of ranks in column A,B	15 , 40		Sum of ranks in column A,B	23 , 32
Mann-Whitney U	8		Mann-Whitney U	0		Mann-Whitney U	8

## Sheet: S5I
COL1 protein
WT / Cre	miR31 / Cre
0.356568	0.137032
0.288216	0.303197
0.247915	0.445009
0.198117	0.515307
0.329053	0.339948
Unpaired t test
P value	0.3909
P value summary	ns
Significantly different (P < 0.05)?	No
One- or two-tailed P value?	Two-tailed
t, df	t=0.9070, df=8
